# Supplementary material
Source: Springer Nature journal article supplement (https://www.springermedizin.de/resource/supplementary/12985_2007_304_MOESM3_ESM.pdf/9607750)

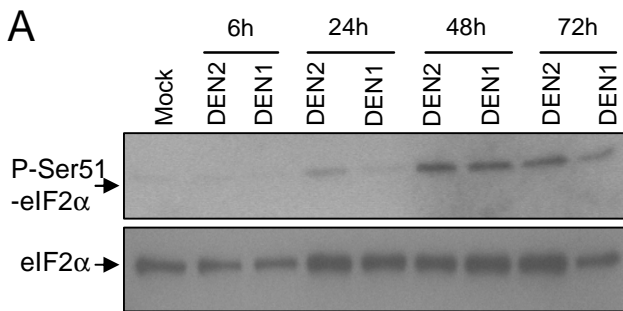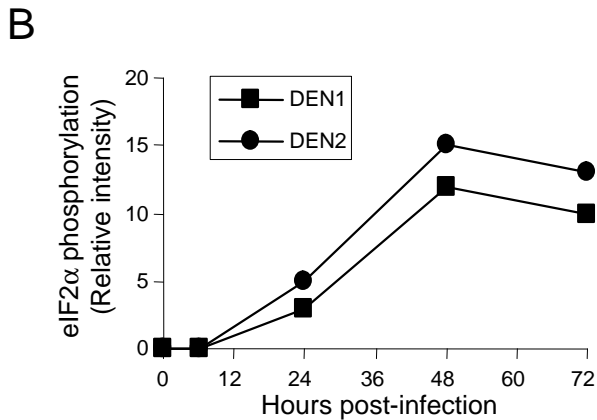

Supplement: MOESM3 [file 9607750]
